# Supplementary material
Source: HighWire-hosted journal article supplement (https://bmjopen.bmj.com/content/12/2/e048933)
Supplement: inline-supplementary-material-1 [file inline-supplementary-material-1.pdf]

Supplemental Table I Datasets used from Statistics Netherlands

| NAME                         | CONTENT                    |
|------------------------------|----------------------------|
| JGDHULPBUS                   | youth care data            |
| GBAPERSONNTAB                | Individual characteristics |
| GBAadresobjectbus            | Pseudonymised addresses    |
| VSLGWbtab, GBAHUISHOUDENSBUS | Household data             |
| ONDERWIJSINSCHRTAB           | Education data             |

NB. Datasets were combined by using pseudonymised identity numbers and pseudonymised household numbers.

Supplemental Table II Different types of youth care use in time

| year | Total population 0-18<br>N | Primary youth care<br>N(%) | Specialist youth care<br>N(%) | Residential youth care<br>N(%) |
|------|----------------------------|----------------------------|-------------------------------|--------------------------------|
| 2015 | 106,689                    | 2,380 (2.2%)               | 7,643 (7.2%)                  | 1,238 (1.2%)                   |
| 2016 | 116,782                    | 3,620 (3.1%)               | 8,041 (6.9%)                  | 1,326 (1.1%)                   |
| 2017 | 116,508                    | 9,263 (8.0%)               | 7,677 (6.6%)                  | 1,482 (1.3%)                   |
| 2018 | 115,617                    | 9,795 (8.5%)               | 7,411 (6.4%)                  | 1,332 (1.2%)                   |
